# Supplementary material for: Genome-wide linkage and association study implicates the 10q26 region as a major genetic contributor to primary nonsyndromic vesicoureteric reflux
Source: Springer Nature journal article supplement (doi:10.1038/s41598-017-15062-9), 2017-10-30
Supplement: 41598_2017_15062_MOESM1_ESM.pdf [file 41598_2017_15062_MOESM1_ESM.pdf]

# Genome-wide linkage and association study implicates the 10q26 region as a major genetic contributor to primary nonsyndromic vesicoureteric reflux

**John M. Darlow<sup>1,2,+</sup>, Rebecca Darlay<sup>3,+</sup>, Mark G. Dobson<sup>1,2</sup>, Aisling Stewart<sup>3</sup>, Pimphen Charoen<sup>4,5</sup>, Jennifer Southgate<sup>6</sup>, Simon C. Baker<sup>6</sup>, Yaobo Xu<sup>3</sup>, Manuela Hunziker<sup>2,7</sup>, Heather J. Lambert<sup>8</sup>, Andrew J. Green<sup>1,9</sup>, Mauro Santibanez-Koref<sup>3</sup>, John A. Sayer<sup>3</sup>, Timothy H.J. Goodship<sup>3</sup>, Prem Puri<sup>2,10</sup>, Adrian S. Woolf<sup>11,12</sup>, Rajko B. Kenda<sup>13</sup>, David E. Barton<sup>1,9</sup>, and Heather J. Cordell<sup>3,\*</sup>**

<sup>1</sup>Department of Clinical Genetics, Our Lady's Children's Hospital, Crumlin, Dublin 12, Ireland

<sup>2</sup>National Children's Research Centre, Our Lady's Children's Hospital, Crumlin, Dublin 12, Ireland

<sup>3</sup>Institute of Genetic Medicine, Newcastle University, Central Parkway, Newcastle upon Tyne, NE1 3BZ, UK

<sup>4</sup>UCL Institute of Health Informatics, University College, London, NW1 2DA, UK

<sup>5</sup>Department of Tropical Hygiene, Faculty of Tropical Medicine, Mahidol University, Bangkok

10400, Thailand <sup>6</sup>Jack Birch Unit of Molecular Carcinogenesis, Department of Biology, University of York, York, YO10 5DD, UK <sup>7</sup>University Children's Hospital Zurich, Steinwiesstrasse 75, 8032 Zurich, Switzerland

<sup>8</sup>Royal Victoria Infirmary, Newcastle upon Tyne, NE1 4LP, UK

<sup>9</sup>University College Dublin Department of Medical Genetics, Our Lady's Children's Hospital, Crumlin, Dublin 12, Ireland

<sup>10</sup>University College Dublin, Stillorgan Rd, Belfield, Dublin 4, Ireland

<sup>11</sup>Division of Cell Matrix Biology and Regenerative Medicine, Faculty of Biology, Medicine and Health, University of Manchester, UK

<sup>12</sup>Royal Manchester Children's Hospital and Manchester Academic Health Sciences Centre, Manchester, UK

<sup>13</sup>Department of Pediatric Nephrology, University Medical Centre Ljubljana, Ljubljana, Slovenia

\*heather.cordell@newcastle.ac.uk

+these authors contributed equally to this work

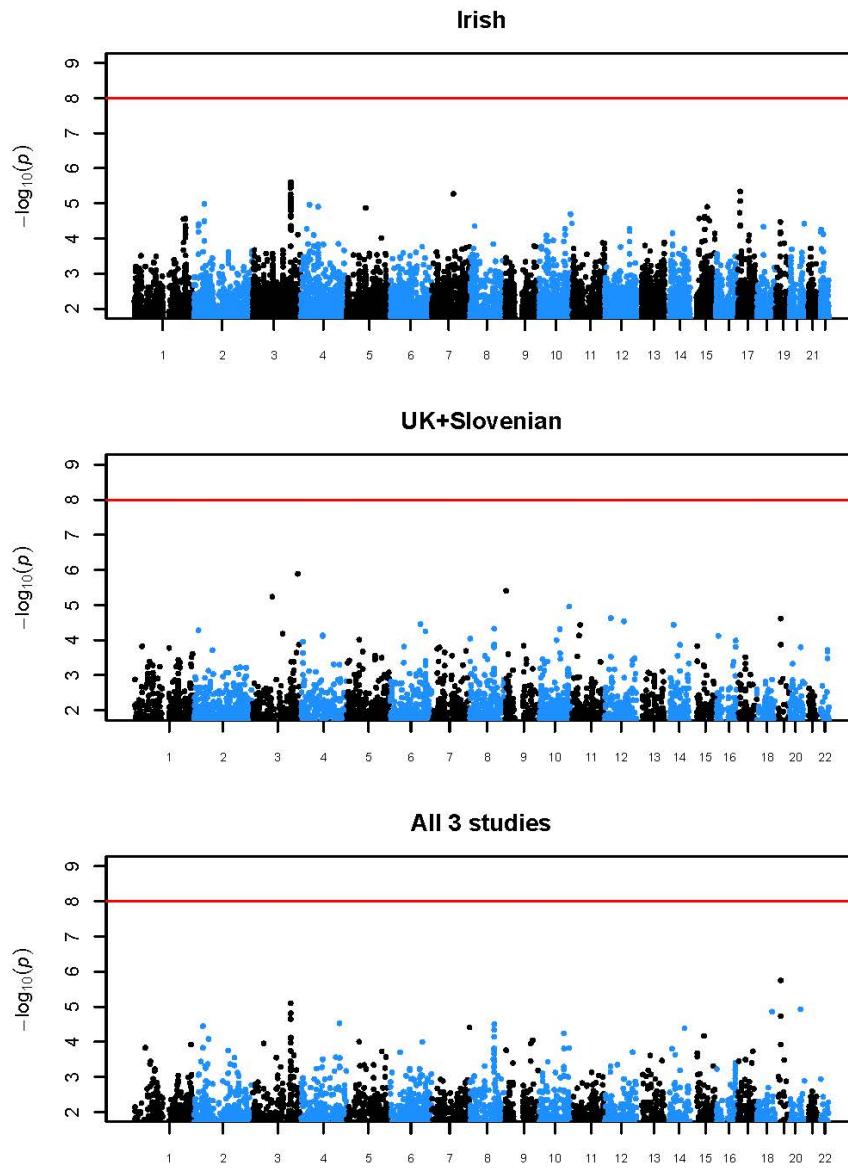

**Figure S1:** Family-based association (TDT) results at genotyped SNPs. The x axis denotes chromosome (with SNPs ordered by base pair position) while the y axis denotes  $-\log_{10}(p\text{-value})$ . A red horizontal line is drawn at a genome-wide significance threshold of  $P=1 \times 10^{-8}$ .

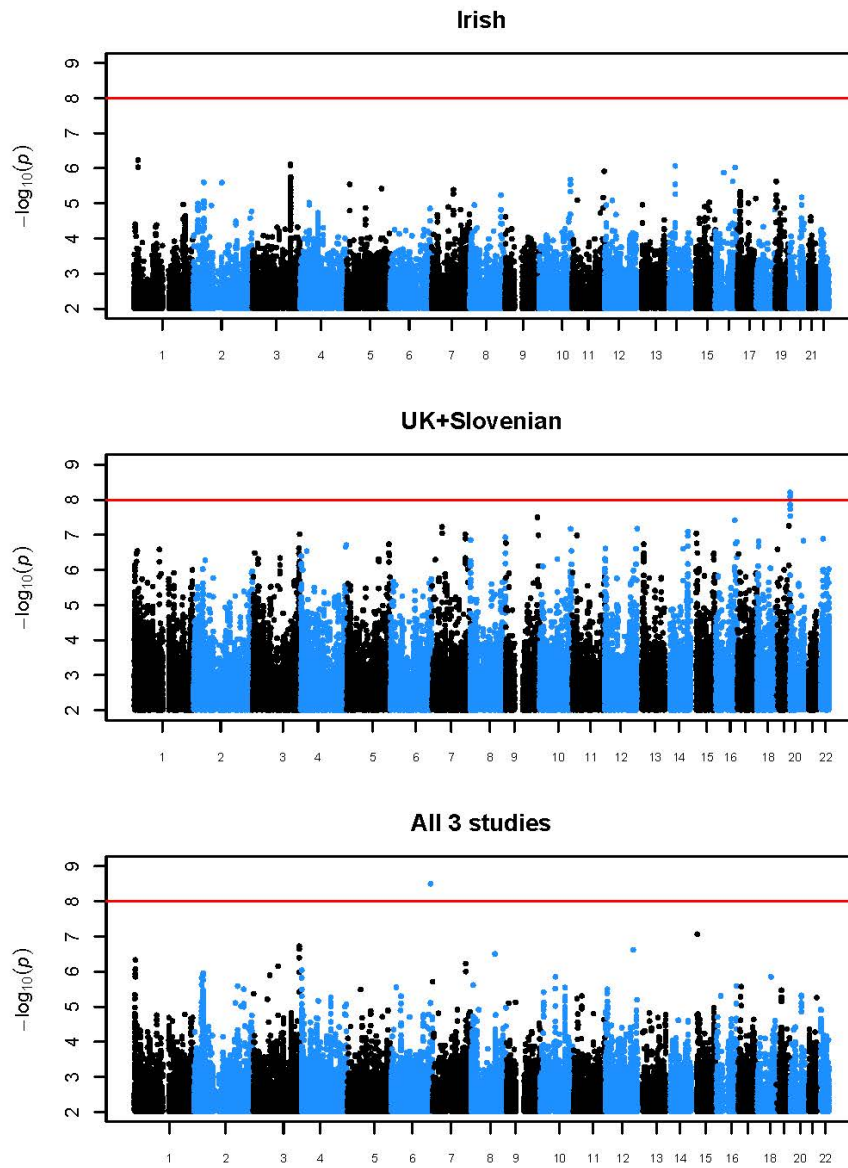

**Figure S2:** Family-based association (TDT) results at imputed SNPs. The x axis denotes chromosome (with SNPs ordered by base pair position) while the y axis denotes  $-\log_{10}(p\text{-value})$ . A red horizontal line is drawn at a genome-wide significance threshold of  $P=1 \times 10^{-8}$ .

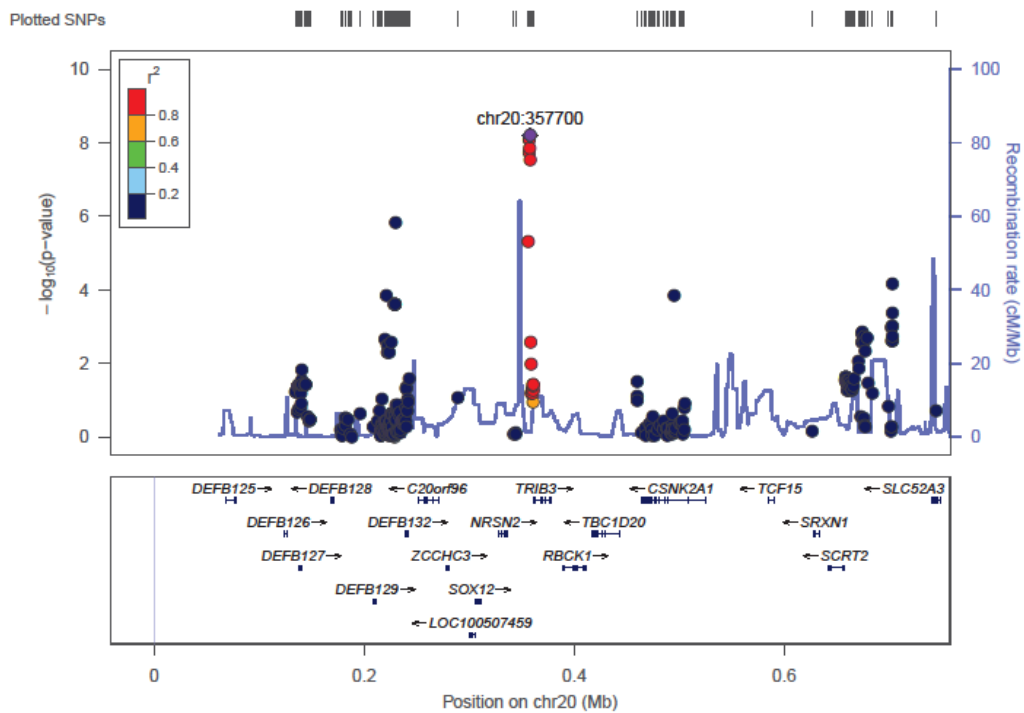

**Figure S3:** LocusZoom plot (GRCh37 positions) of TDT results at imputed SNPs in the UK/Slovenian cohorts, centered around index SNP rs6138998 (chr20:357700) on chromosome 20. The index SNP is shown as a purple diamond, while other SNPs are colored according to their correlation with the index SNP.

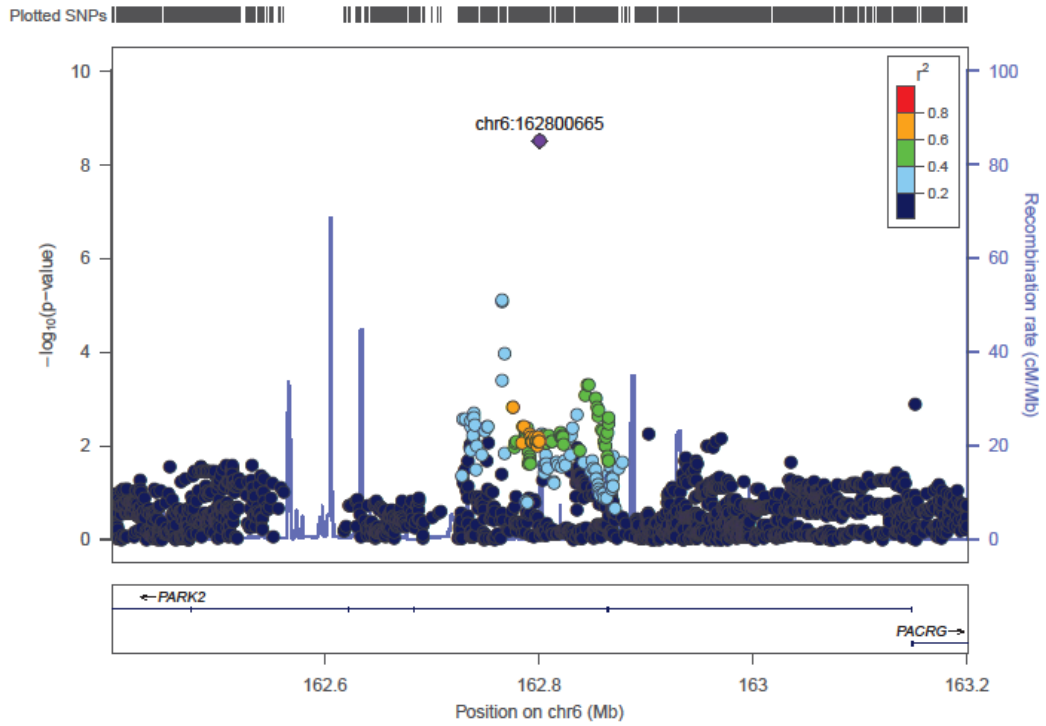

**Figure S4:** LocusZoom plot (GRCh37 positions) of TDT results at imputed SNPs in the combined Irish/UK/Slovenian cohorts, centered around index SNP rs11759064 (chr6:162800665) on chromosome 6. The index SNP is shown as a purple diamond, while other SNPs are colored according to their correlation with the index SNP.

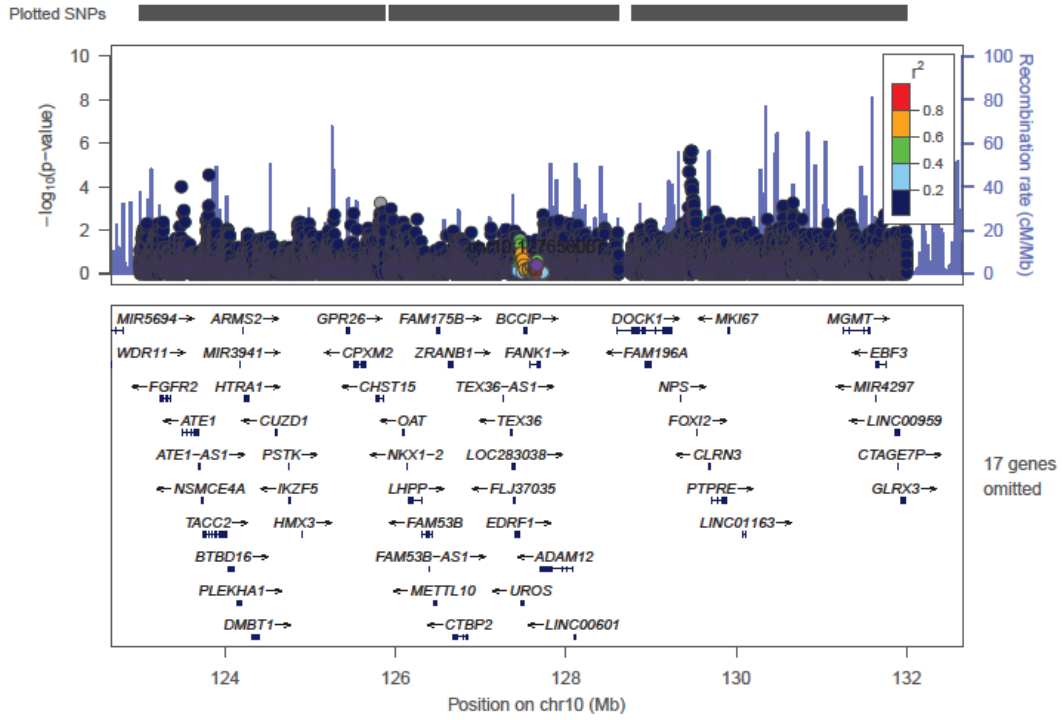

**Figure S5:** LocusZoom plot (GRCh37 positions) of TDT results at imputed SNPs in the Irish cohort, centered around index SNP rs7907300 (chr10:127656067) on chromosome 10. The index SNP is shown as a purple diamond, while other SNPs are colored according to their correlation with the index SNP.

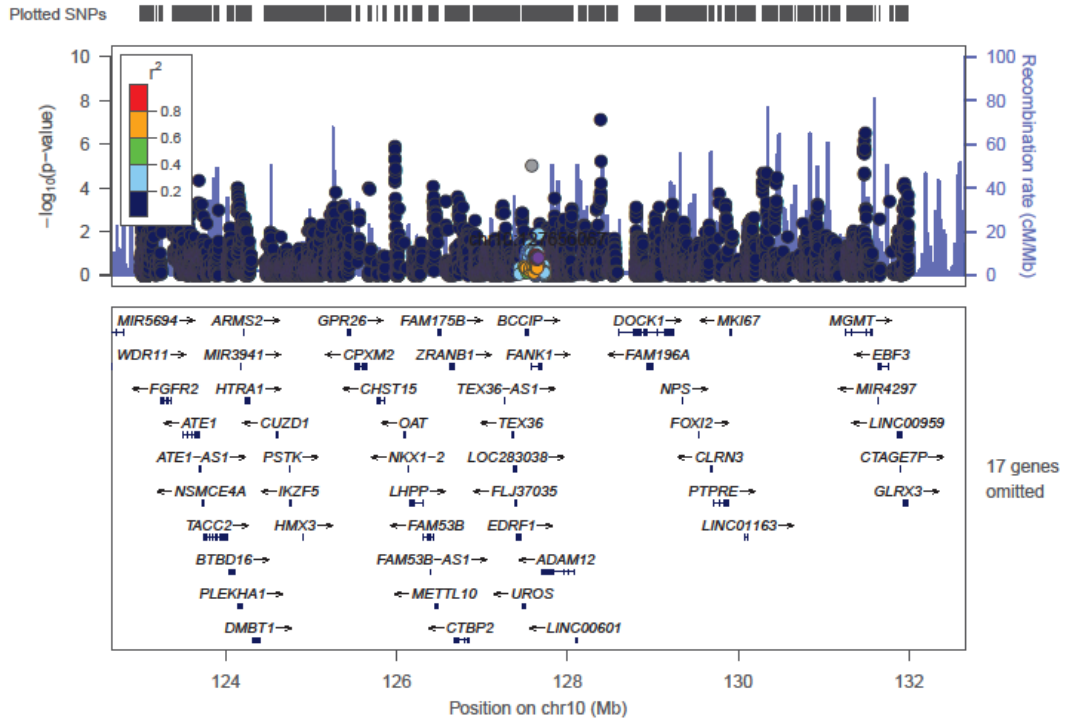

**Figure S6:** LocusZoom plot (GRCh37 positions) of TDT results at imputed SNPs in the UK/Slovenian cohorts, centered around index SNP rs7907300 (chr10:127656067) on chromosome 10. The index SNP is shown as a purple diamond, while other SNPs are colored according to their correlation with the index SNP.

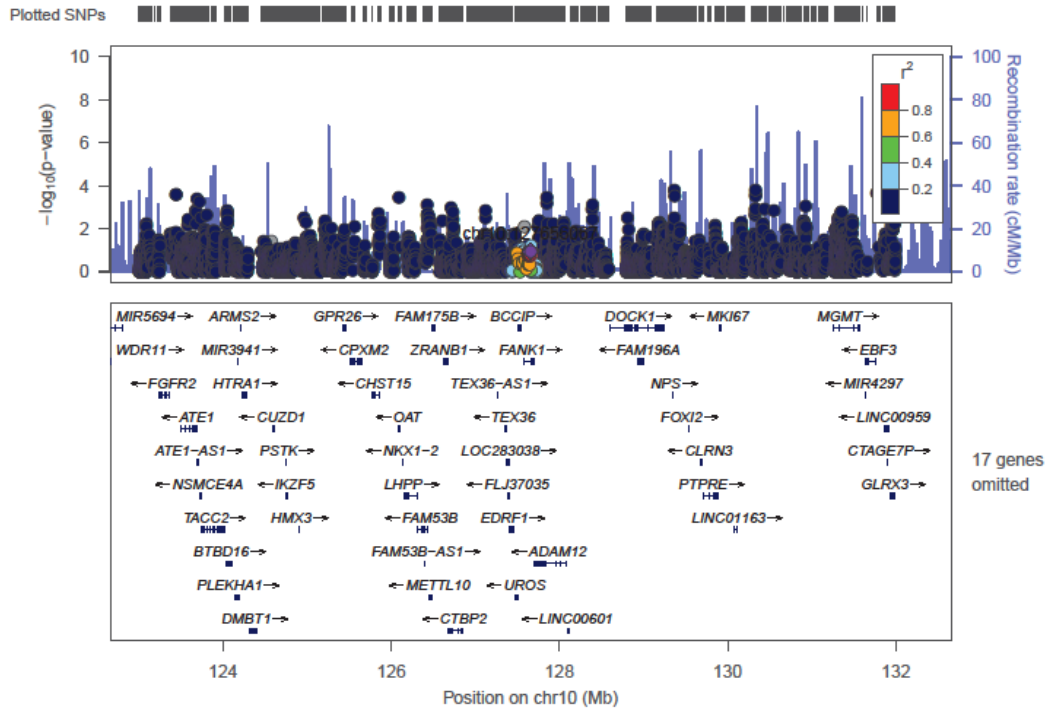

**Figure S7:** LocusZoom plot (GRCh37 positions) of TDT results at imputed SNPs in the combined Irish/UK/Slovenian cohorts, centered around index SNP rs7907300 (chr10:127656067) on chromosome 10. The index SNP is shown as a purple diamond, while other SNPs are colored according to their correlation with the index SNP.



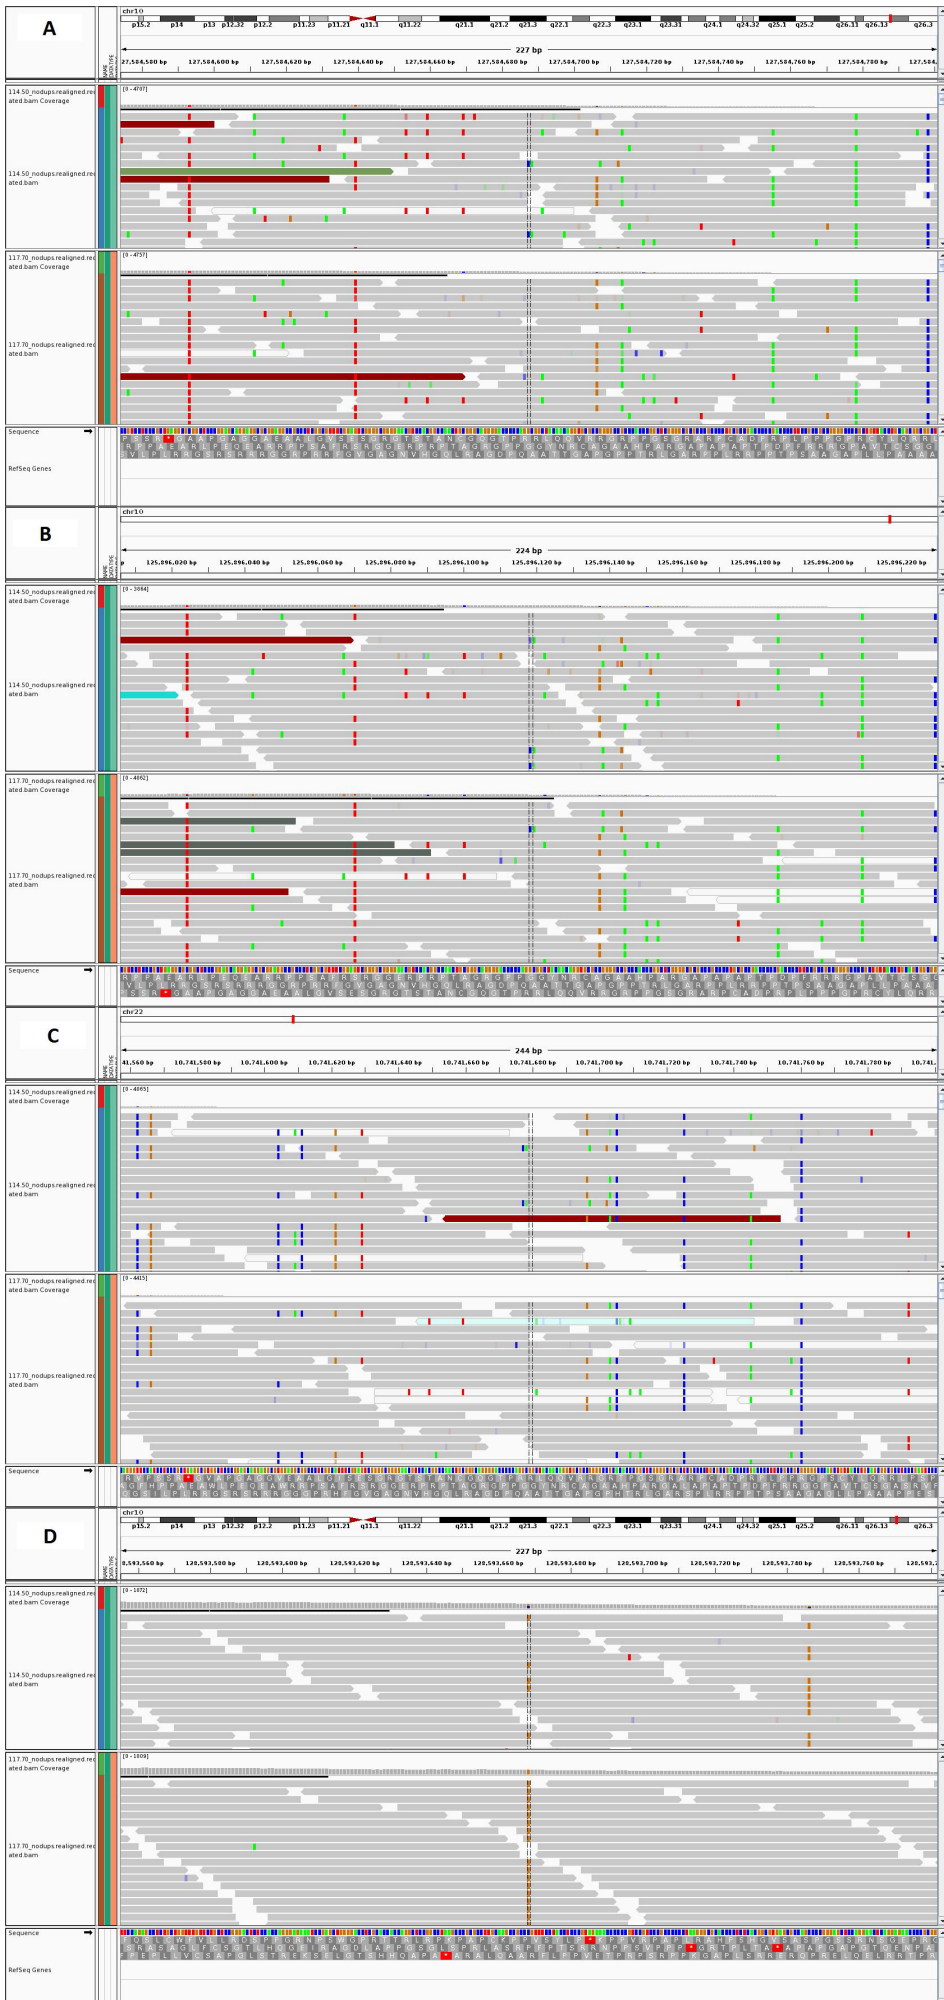

**Figure S8:** Visual representation of .bam files in IGV for a 227 bp window of the same aligned reads mapped to different genome builds and loci. Samples 114.50 and 117.30 are representative of the cohort. Bases matching the reference are coloured grey, variant bases are coloured: green = A, blue = C, orange = G, red = T. Coloured reads are coloured by insert size according to the default IGV scheme, as an indicator of the quality of the alignment: red = inferred insert size is larger than expected and indicative of possible deletions, blue = inferred insert size is smaller than expected and indicative of possible insertions, green = paired end read mate is on chromosome 3, dark grey = paired end read mate is on chromosome 12. A) Alignment of reads mapped to Chr10:127584574-127584800 on GRCh37 (hg19) reference genome. B) Alignment of reads mapped to Chr10:125896006-125896229 on the GRCh38 reference genome. C) Alignments of reads mapped to Chr22:10741557-10741800 on the GRCh38 reference genome. D) Reads mapped to Chr10:128593555-128593781 on GRCh37 to illustrate a 'normal' alignment, in order to show how comparatively few variants one would usually find in a window of this size. The G/C SNV seen is a common SNP, rs12781269, in the promoter flanking region of DOCK1.

# UCSC Genome Browser on Human Dec. 2013 (GRCh38/hg38) Assembly

move <<< << < > >> >>> zoom in 1.5x 3x 10x base zoom out 1.5x 3x 10x 100x

chr10:125,874,000-125,940,000 66,001 bp. enter position, gene symbol, HGVS or search terms go

chr10 (q26.2) 10p14 10p13 p12.1 10q21.1 q21.3 22.1 q22.3 q23.1 q25.1 25.3 q26.3

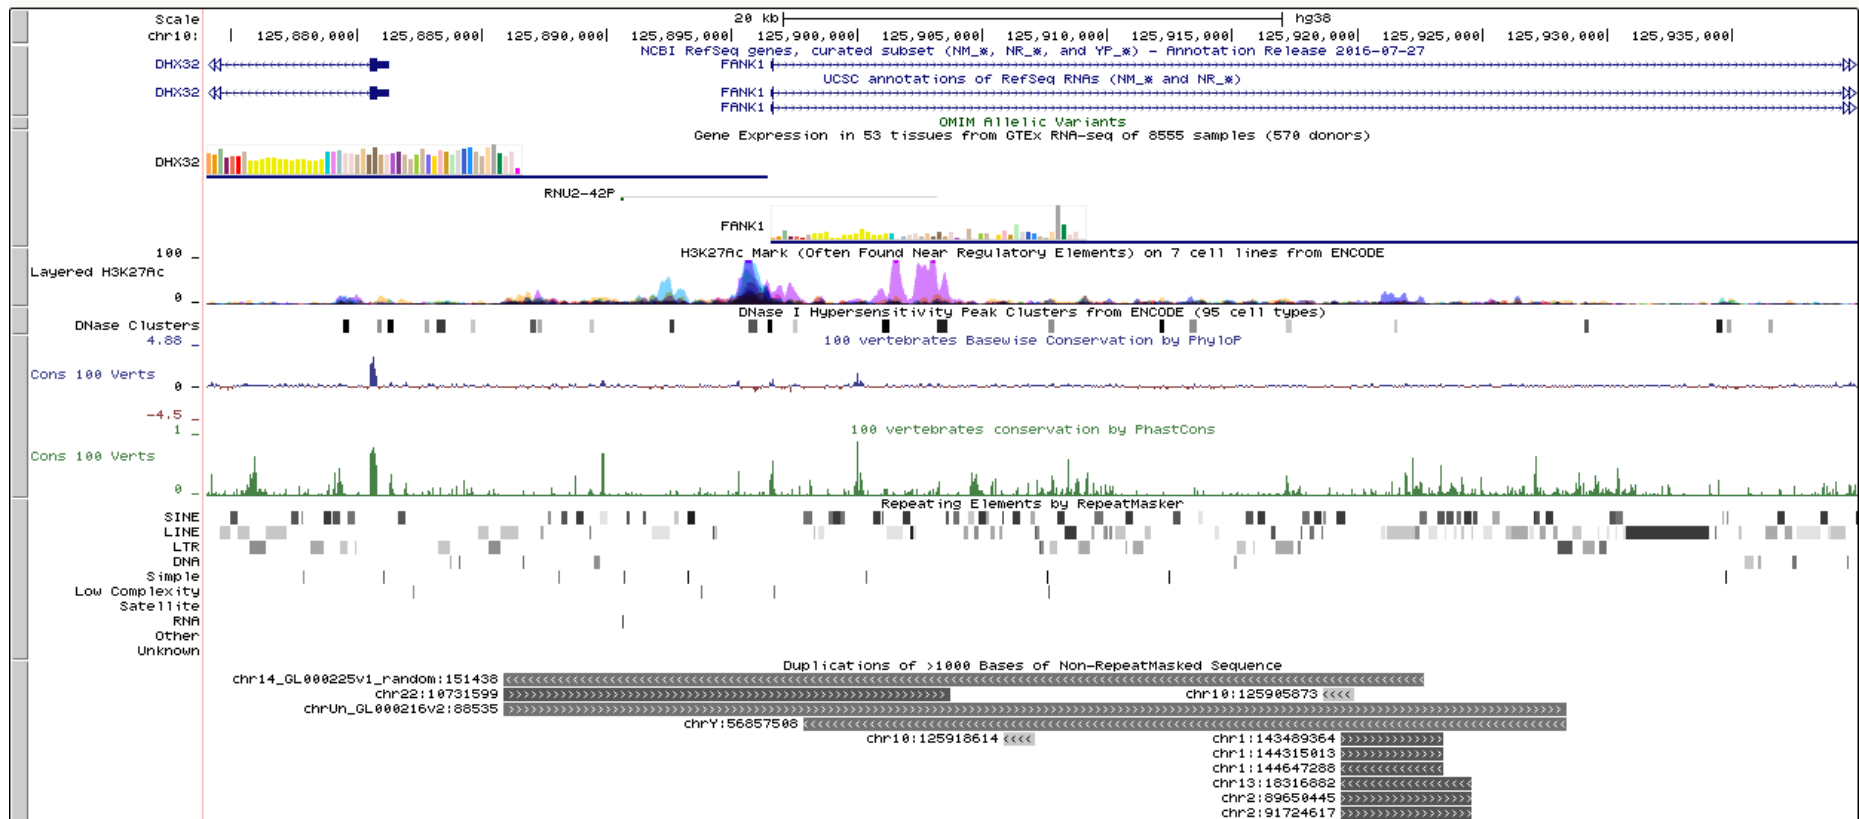

**Figure S9:** Segmental duplication of a 42.4 kb region of chromosome 10 from 125885884 to 125928375 (GRCh38 assembly), as shown by UCSC Genome Browser

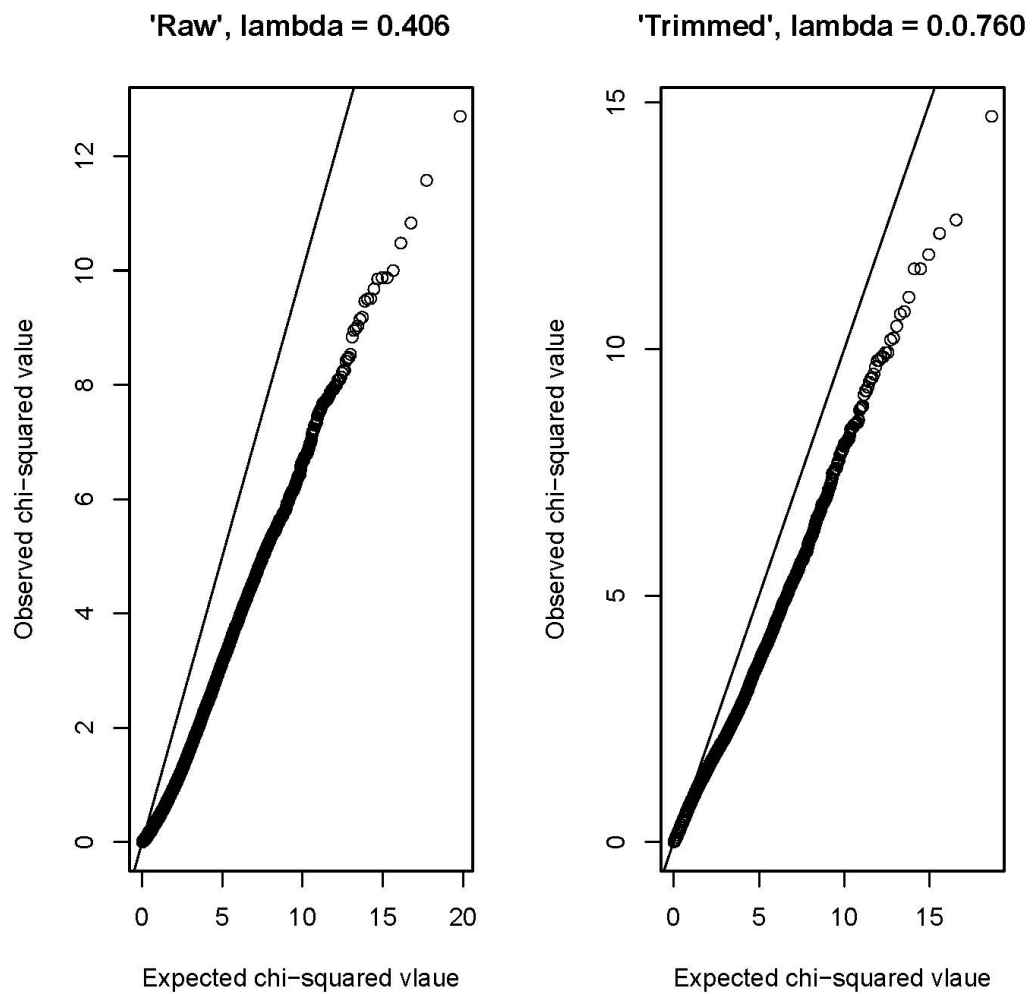

**Figure S10:** Quantile-Quantile (Q-Q) plots showing the ordered  $-\log_{10}(\text{p-values})$  from TASER against their expected values under the null hypothesis of no differences between cases and controls. Left hand plot shows the 'raw' results where every allele seen in any sequencing read is counted. Right hand plot shows the 'trimmed' results where only alleles seen at least 5 times in that position in the cases (high read depth) and at least twice in the controls (low read depth) are counted.

| SIGNAL | COHORT                      | CHR | SNP         | RSID       | BP        | A1 | A2 | MAF    | T   | U   | OR     | CHISQ | P        |
|--------|-----------------------------|-----|-------------|------------|-----------|----|----|--------|-----|-----|--------|-------|----------|
| 1      | Irish                       | 20  | 20:356785   | rs6037460  | 356785    | A  | G  | 0.3329 | 183 | 165 | 1.109  | 0.931 | 0.3346   |
| 1      | Irish                       | 20  | 20:356861   | rs6051546  | 356861    | G  | A  | 0.3346 | 183 | 163 | 1.123  | 1.156 | 0.2823   |
| 1      | Irish                       | 20  | 20:357050   | rs6084242  | 357050    | C  | T  | 0.3329 | 183 | 165 | 1.109  | 0.931 | 0.3346   |
| 1      | Irish                       | 20  | 20:357128   | rs6051547  | 357128    | A  | T  | 0.3313 | 180 | 164 | 1.098  | 0.744 | 0.3883   |
| 1      | Irish                       | 20  | 20:357700   | rs6138998  | 357700    | T  | C  | 0.3321 | 185 | 163 | 1.135  | 1.391 | 0.2383   |
| 1      | UK/Slovenian                | 20  | 20:356785   | rs6037460  | 356785    | A  | G  | 0.2168 | 42  | 114 | 0.3684 | 33.23 | 8.19E-09 |
| 1      | UK/Slovenian                | 20  | 20:356861   | rs6051546  | 356861    | G  | A  | 0.2168 | 42  | 114 | 0.3684 | 33.23 | 8.19E-09 |
| 1      | UK/Slovenian                | 20  | 20:357050   | rs6084242  | 357050    | C  | T  | 0.2175 | 46  | 118 | 0.3898 | 31.61 | 1.89E-08 |
| 1      | UK/Slovenian                | 20  | 20:357128   | rs6051547  | 357128    | A  | T  | 0.2203 | 48  | 122 | 0.3934 | 32.21 | 1.38E-08 |
| 1      | UK/Slovenian                | 20  | 20:357700   | rs6138998  | 357700    | T  | C  | 0.232  | 53  | 132 | 0.4015 | 33.74 | 6.32E-09 |
| 1      | Combined Irish/UK/Slovenian | 20  | 20:356785   | rs6037460  | 356785    | A  | G  | 0.2752 | 225 | 279 | 0.8065 | 5.786 | 0.01616  |
| 1      | Combined Irish/UK/Slovenian | 20  | 20:356861   | rs6051546  | 356861    | G  | A  | 0.2759 | 225 | 277 | 0.8123 | 5.386 | 0.02029  |
| 1      | Combined Irish/UK/Slovenian | 20  | 20:357050   | rs6084242  | 357050    | C  | T  | 0.2755 | 229 | 283 | 0.8092 | 5.695 | 0.01701  |
| 1      | Combined Irish/UK/Slovenian | 20  | 20:357128   | rs6051547  | 357128    | A  | T  | 0.2757 | 228 | 286 | 0.7972 | 6.545 | 0.01052  |
| 1      | Combined Irish/UK/Slovenian | 20  | 20:357700   | rs6138998  | 357700    | T  | C  | 0.2812 | 238 | 295 | 0.8068 | 6.096 | 0.01355  |
| 2      | Irish                       | 6   | 6:162800665 | rs11759064 | 162800665 | T  | C  | 0.1264 | 38  | 80  | 0.475  | 14.95 | 0.00011  |
| 2      | UK/Slovenian                | 6   | 6:162800665 | rs11759064 | 162800665 | T  | C  | 0.1323 | 41  | 93  | 0.4409 | 20.18 | 7.05E-06 |
| 2      | Combined Irish/UK/Slovenian | 6   | 6:162800665 | rs11759064 | 162800665 | T  | C  | 0.1298 | 79  | 173 | 0.4566 | 35.06 | 3.19E-09 |

**Table S1:** TDT results from imputed SNPs passing significance threshold  $P < 2E-08$  in individual or combined cohorts. A1 refers to the minor allele, and T and U to the number of times it is transmitted or untransmitted from heterozygous parents to affected offspring.

| Gene                  | Start     | End       | Orientation | Notes                                                             | Closest linkage score |        |
|-----------------------|-----------|-----------|-------------|-------------------------------------------------------------------|-----------------------|--------|
|                       |           |           |             |                                                                   | SNP                   | HLOD   |
| WDR11                 | 122610687 | 122669036 | +           | WD repeat domain 11                                               | rs2420779             | 0.4842 |
| FGFR2                 | 123237848 | 123359792 | -           | Fibroblast growth factor receptor 2                               | rs1693682             | 0.6330 |
| ATE1                  | 123499939 | 123688316 | -           | Arginyltransferase 1                                              | rs12354464            | 0.6848 |
| ATE1-AS1              | 123687827 | 123711480 | +           | arginyltransferase 1 antisense1                                   | rs12354464            | 0.6848 |
| NSMCE4A               | 123716603 | 123734732 | -           | NSE4 homolog A. SMC5-SMC6 complex component                       | rs12354464            | 0.6848 |
| TACC2                 | 123748689 | 124014060 | +           | transforming acidic coiled-coil containing protein 2              | rs2461215             | 0.8433 |
| BTBD16                | 124030821 | 124097677 | +           | BTB domain containing 16                                          | rs7088058             | 0.9436 |
| PLEKHA1               | 124134212 | 124191867 | +           | pleckstrin homology domain containing A1                          | rs7088058             | 0.9436 |
| MIR3941               | 124176481 | 124176583 | +           | microRNA 3941; post-transcriptional regulation of gene expression | rs7088058             | 0.9436 |
| ARMS2                 | 124214169 | 124216868 | +           | age-related maculopathy susceptibility 2                          | rs7088058             | 0.9436 |
| HTRA1                 | 124221040 | 124274424 | +           | HtrA serine peptidase 1                                           | rs7088058             | 0.9436 |
| DMBT1                 | 124320181 | 124403252 | +           | deleted in malignant brain tumours 1                              | rs17104231            | 1.1216 |
| C10orf120             | 124457225 | 124459338 | -           | Chromosome 10 open reading frame 120                              | rs17104231            | 1.1216 |
| DMBT1P1               | 124516210 | 124558696 | +           | deleted in malignant brain tumours pseudogene 1                   | rs17104231            | 1.1216 |
| FAM24B-CUZD1          | NA        | NA        | -           | NA                                                                | NA                    | NA     |
| CUZD1                 | 124591665 | 124639146 | -           | CUB and zona pellucida like domains 1                             | rs17104231            | 1.1216 |
| FAM24B                | 124608594 | 124639157 | -           | family with sequence similarity 24 member B                       | rs17104231            | 1.1216 |
| LOC399815             | 124643295 | 124658230 | +           | Chromosome 10 open reading frame 88 pseudogene                    | rs17104231            | 1.1216 |
| FAM24A                | 124670217 | 124672627 | +           | family with sequence similarity 24 member A                       | rs17104231            | 1.1216 |
| C10orf88 <sup>a</sup> | 124690419 | 124713919 | -           | Chromosome 10 open reading frame 88                               | rs17104231            | 1.1216 |
| PSTK                  | 124713897 | 124757029 | +           | phosphoseryl-tRNA kinase                                          | rs17104231            | 1.1216 |

|                     |           |           |   |                                                                                               |            |        |
|---------------------|-----------|-----------|---|-----------------------------------------------------------------------------------------------|------------|--------|
| IKZF5               | 124750322 | 124768333 | - | IKAROS family zinc finger 5; transcription factor                                             | rs17104231 | 1.1216 |
| ACADSB <sup>a</sup> | 124768495 | 124817827 | + | acyl-CoA dehydrogenase, short/branched chain                                                  | rs17104231 | 1.1216 |
| HMX3                | 124895478 | 124897257 | + | H6 family homeobox 3; transcription factor                                                    | rs7918922  | 1.3690 |
| HMX2 <sup>a</sup>   | 124907638 | 124910188 | + | H6 family homeobox 2; transcription factor                                                    | rs7918922  | 1.3690 |
| BUB3 <sup>a</sup>   | 124913793 | 124924886 | + | mitotic check point protein                                                                   | rs7918922  | 1.3690 |
| GPR26               | 125415871 | 125454123 | + | G protein-coupled receptor 26                                                                 | rs2479901  | 1.6074 |
| CPXM2               | 125465723 | 125699783 | - | carboxypeptidase X, M14 family member 1                                                       | rs17680424 | 2.6678 |
| CHST15              | 125767184 | 125853206 | - | carbohydrate sulfotransferase 15                                                              | rs17680424 | 2.6678 |
| OAT                 | 126085872 | 126107545 | - | ornithine aminotransferase                                                                    | rs4962728  | 2.8835 |
| NKX1-2              | 126135592 | 126138753 | - | NK1 homeobox 2                                                                                | rs4962728  | 2.8835 |
| LHPP                | 126150403 | 126306457 | + | phospholysine phosphohistidine inorganic pyrophosphate phosphatase                            | rs11245344 | 4.0428 |
| FAM53B              | 126307861 | 126432838 | - | family with sequence similarity 53 member B                                                   | rs11245344 | 4.0428 |
| FAM53B-AS1          | 126392194 | 126402786 | + | family with sequence similarity 53 member B antisense 1                                       | rs11245344 | 4.0428 |
| METTL10             | 126436718 | 126480439 | - | lysine methyltransferase 2                                                                    | rs11245344 | 4.0428 |
| FAM175B             | 126490354 | 126525239 | + | ABRAXAS2; BRISC complex subunit                                                               | rs11245344 | 4.0428 |
| ZRANB1              | 126630692 | 126676758 | + | zinc finger RANBP2-type containing 1                                                          | rs11245344 | 4.0428 |
| CTBP2               | 126676421 | 126849739 | - | C-terminal binding protein 2; transcriptional repressor                                       | rs11245344 | 4.0428 |
| MIR4296             | 126721352 | 126721439 | - | microRNA 4296; post-transcriptional regulation of gene expression                             | rs11244392 | 4.3156 |
| TEX36-AS1           | 127262940 | 127267014 | + | testis expressed 36 antisense 1                                                               | rs2365818  | 4.6879 |
| TEX36               | 127265091 | 127371713 | - | testis expressed 36                                                                           | rs2365818  | 4.6879 |
| LOC283038           | 127371812 | 127398627 | + | uncharacterised                                                                               | rs1872006  | 4.8556 |
| FLJ37035            | 127389005 | 127408135 | - | uncharacterised                                                                               | rs1872006  | 4.8556 |
| EDRF1               | 127408084 | 127452712 | + | erthyroid differentiation regulatory factor 1; inhibits binding of transcription factor GATA1 | rs1872006  | 4.8556 |

|           |           |           |   |                                                                   |            |        |
|-----------|-----------|-----------|---|-------------------------------------------------------------------|------------|--------|
| EDRF1-AS1 | 127433296 | 127440679 | - | erthyroid differentiation regulatory factor 1 antisense 1         | rs1872006  | 4.8556 |
| MMP21     | 127455022 | 127464390 | - | matrix metallopeptidase 21                                        | rs1872006  | 4.8556 |
| UROS      | 127477146 | 127511817 | - | uroporphyrinogen III synthase                                     | rs7907300  | 4.9066 |
| MIR4484   | 127508309 | 127508391 | + | microRNA 4484; post-transcriptional regulation of gene expression | rs7907300  | 4.9066 |
| BCCIP     | 127512115 | 127542264 | + | BRCA2 and CDKN1A interacting protein                              | rs7907300  | 4.9066 |
| DHX32     | 127524906 | 127585005 | - | DEAH-box helicase 32                                              | rs7907300  | 4.9066 |
| FANK1     | 127585108 | 127698161 | + | fibronectin type III and ankyrin repeat domains 1                 | rs7907300  | 4.9066 |
| FANK1-AS1 | 127660757 | 127661695 | - | fibronectin type III and ankyrin repeat domains 1 antisense 1     | rs7907300  | 4.9066 |
| ADAM12    | 127700950 | 128077024 | - | ADAM metallopeptidase 12                                          | rs10794060 | 4.7134 |
| LINC00601 | 128102438 | 128110448 | - | long intergenic non-protein coding RNA 601                        | rs7084896  | 4.4969 |
| C10orf90  | 128113566 | 128359079 | - | Chromosome 10 open reading frame 90                               | rs12246110 | 4.1524 |
| DOCK1     | 128593978 | 129250781 | + | dedicator of cytokinese 1                                         | rs12415496 | 3.7981 |
| FAM196A   | 128933694 | 128994422 | - | family with sequence similarity 196 member A                      | rs4622171  | 3.3823 |
| NPS       | 129347613 | 129350935 | + | neuropeptide S                                                    | rs3740547  | 3.5271 |
| FOXI2     | 129535499 | 129539450 | + | forkhead box I2                                                   | rs4751461  | 3.5861 |
| CLRN3     | 129676105 | 129691211 | - | clarin 3                                                          | rs2148895  | 3.3913 |
| PTPRE     | 129705325 | 129884119 | + | protein tyrosine phosphatase receptor type E                      | rs2148895  | 3.3913 |
| MKI67     | 129894923 | 129924649 | - | marker of proliferation Ki-67                                     | rs2148895  | 3.3913 |
| LINC01163 | 130084213 | 130115990 | + | long intergenic non-protein coding RNA 1163                       | rs7900125  | 3.3749 |
| MGMT      | 131265448 | 131566271 | + | O-6-methylguanine-DNA methyltransferase                           | rs11016797 | 2.0239 |
| EBF3      | 131633547 | 131762105 | - | early B cell factor 3; DNA binding transcription factor           | rs3793907  | 1.9411 |
| MIR4297   | 131641563 | 131641638 | - | microRNA 4297; post-transcriptional regulation of gene expression | rs3793907  | 1.9411 |
| LINC00959 | 131864638 | 131909081 | - | long intergenic non-protein coding RNA 959                        | rs1183343  | 1.4009 |



|         |           |           |   |                                   |           |        |
|---------|-----------|-----------|---|-----------------------------------|-----------|--------|
| CTAGE7P | 131904273 | 131907095 | + | CTAGE family member 7, pseudogene | rs1183343 | 1.4009 |
| GLRX3   | 131934663 | 131982785 | + | glutaredoxin                      | rs318934  | 1.4381 |

**Table S2:** Genes in the 9Mb targeted region of chromosome 10. Start and End bp positions are aligned to GRCh37 (Feb 2014).

<sup>a</sup> these genes are omitted from Figure 3

| SIGNAL | COHORT                      | CHR | SNP          | RSID       | BP        | A1 | A2 | MAF    | T   | U   | OR     | CHISQ | P        |
|--------|-----------------------------|-----|--------------|------------|-----------|----|----|--------|-----|-----|--------|-------|----------|
| 1      | Irish                       | 10  | 10:129452307 | rs2386898  | 129452307 | C  | T  | 0.1476 | 147 | 77  | 1.909  | 21.88 | 2.91E-06 |
| 1      | Irish                       | 10  | 10:129455999 | rs11018245 | 129455999 | G  | A  | 0.1481 | 148 | 79  | 1.873  | 20.97 | 4.66E-06 |
| 1      | Irish                       | 10  | 10:129456705 | rs11018246 | 129456705 | G  | A  | 0.1481 | 148 | 79  | 1.873  | 20.97 | 4.66E-06 |
| 1      | Irish                       | 10  | 10:129469918 | rs60182575 | 129469918 | G  | A  | 0.1468 | 144 | 74  | 1.946  | 22.48 | 2.13E-06 |
| 1      | Irish                       | 10  | 10:129474049 | rs12247046 | 129474049 | C  | G  | 0.1468 | 144 | 74  | 1.946  | 22.48 | 2.13E-06 |
| 1      | Irish                       | 10  | 10:129474336 | rs60100674 | 129474336 | G  | T  | 0.1468 | 144 | 74  | 1.946  | 22.48 | 2.13E-06 |
| 1      | Irish                       | 10  | 10:129474758 | rs78697163 | 129474758 | G  | C  | 0.1468 | 144 | 74  | 1.946  | 22.48 | 2.13E-06 |
| 1      | UK/Slovenian                | 10  | 10:129452307 | rs2386898  | 129452307 | C  | T  | 0.1281 | 22  | 43  | 0.5116 | 6.785 | 0.009195 |
| 1      | UK/Slovenian                | 10  | 10:129455999 | rs11018245 | 129455999 | G  | A  | 0.1267 | 22  | 44  | 0.5    | 7.333 | 0.006769 |
| 1      | UK/Slovenian                | 10  | 10:129456705 | rs11018246 | 129456705 | G  | A  | 0.1267 | 22  | 44  | 0.5    | 7.333 | 0.006769 |
| 1      | UK/Slovenian                | 10  | 10:129469918 | rs60182575 | 129469918 | G  | A  | 0.1271 | 24  | 43  | 0.5581 | 5.388 | 0.02028  |
| 1      | UK/Slovenian                | 10  | 10:129474049 | rs12247046 | 129474049 | C  | G  | 0.1247 | 24  | 43  | 0.5581 | 5.388 | 0.02028  |
| 1      | UK/Slovenian                | 10  | 10:129474336 | rs60100674 | 129474336 | G  | T  | 0.1261 | 23  | 39  | 0.5897 | 4.129 | 0.04215  |
| 1      | UK/Slovenian                | 10  | 10:129474758 | rs78697163 | 129474758 | G  | C  | 0.1267 | 24  | 40  | 0.6    | 4     | 0.0455   |
| 1      | Combined Irish/UK/Slovenian | 10  | 10:129452307 | rs2386898  | 129452307 | C  | T  | 0.1385 | 169 | 120 | 1.408  | 8.308 | 0.003947 |
| 1      | Combined Irish/UK/Slovenian | 10  | 10:129455999 | rs11018245 | 129455999 | G  | A  | 0.138  | 170 | 123 | 1.382  | 7.539 | 0.006037 |
| 1      | Combined Irish/UK/Slovenian | 10  | 10:129456705 | rs11018246 | 129456705 | G  | A  | 0.138  | 170 | 123 | 1.382  | 7.539 | 0.006037 |
| 1      | Combined Irish/UK/Slovenian | 10  | 10:129469918 | rs60182575 | 129469918 | G  | A  | 0.1374 | 168 | 117 | 1.436  | 9.126 | 0.00252  |
| 1      | Combined Irish/UK/Slovenian | 10  | 10:129474049 | rs12247046 | 129474049 | C  | G  | 0.1362 | 168 | 117 | 1.436  | 9.126 | 0.00252  |
| 1      | Combined Irish/UK/Slovenian | 10  | 10:129474336 | rs60100674 | 129474336 | G  | T  | 0.137  | 167 | 113 | 1.478  | 10.41 | 0.00125  |
| 1      | Combined Irish/UK/Slovenian | 10  | 10:129474758 | rs78697163 | 129474758 | G  | C  | 0.1373 | 168 | 114 | 1.474  | 10.34 | 0.001301 |
| 2      | Irish                       | 10  | 10:125978765 | rs12414492 | 125978765 | A  | G  | 0.3358 | 194 | 154 | 1.26   | 4.598 | 0.03201  |
| 2      | Irish                       | 10  | 10:125979306 | rs12249299 | 125979306 | C  | T  | 0.3354 | 194 | 152 | 1.276  | 5.098 | 0.02395  |



|   |                             |    |              |            |           |   |   |         |     |     |        |         |          |
|---|-----------------------------|----|--------------|------------|-----------|---|---|---------|-----|-----|--------|---------|----------|
| 5 | Irish                       | 10 | 10:131471398 | rs11016864 | 131471398 | A | G | 0.13    | 90  | 94  | 0.9574 | 0.08696 | 0.7681   |
| 5 | Irish                       | 10 | 10:131471611 | rs11016865 | 131471611 | T | C | 0.1309  | 90  | 95  | 0.9474 | 0.1351  | 0.7132   |
| 5 | Irish                       | 10 | 10:131471968 | rs11016866 | 131471968 | A | G | 0.1312  | 89  | 94  | 0.9468 | 0.1366  | 0.7117   |
| 5 | Irish                       | 10 | 10:131472040 | rs57547298 | 131472040 | G | T | 0.1309  | 90  | 95  | 0.9474 | 0.1351  | 0.7132   |
| 5 | Irish                       | 10 | 10:131476611 | rs56880178 | 131476611 | A | G | 0.1312  | 94  | 96  | 0.9792 | 0.02105 | 0.8846   |
| 5 | Irish                       | 10 | 10:131476971 | rs56800605 | 131476971 | T | C | 0.1312  | 94  | 96  | 0.9792 | 0.02105 | 0.8846   |
| 5 | Irish                       | 10 | 10:131477693 | rs12255679 | 131477693 | A | G | 0.1312  | 94  | 96  | 0.9792 | 0.02105 | 0.8846   |
| 5 | Irish                       | 10 | 10:131479653 | rs68109323 | 131479653 | G | A | 0.1324  | 96  | 96  | 1      | 0       | 1        |
| 5 | Irish                       | 10 | 10:131479665 | rs67372222 | 131479665 | G | A | 0.1312  | 94  | 96  | 0.9792 | 0.02105 | 0.8846   |
| 5 | Irish                       | 10 | 10:131479680 | rs12245575 | 131479680 | T | C | 0.1312  | 94  | 96  | 0.9792 | 0.02105 | 0.8846   |
| 5 | Irish                       | 10 | 10:131489398 | rs11016878 | 131489398 | A | G | 0.119   | 85  | 83  | 1.024  | 0.02381 | 0.8774   |
|   |                             |    |              |            |           |   |   |         |     |     |        |         |          |
| 5 | UK/Slovenian                | 10 | 10:131471398 | rs11016864 | 131471398 | A | G | 0.07782 | 16  | 57  | 0.2807 | 23.03   | 1.60E-06 |
| 5 | UK/Slovenian                | 10 | 10:131471611 | rs11016865 | 131471611 | T | C | 0.07782 | 16  | 57  | 0.2807 | 23.03   | 1.60E-06 |
| 5 | UK/Slovenian                | 10 | 10:131471968 | rs11016866 | 131471968 | A | G | 0.07819 | 17  | 58  | 0.2931 | 22.41   | 2.20E-06 |
| 5 | UK/Slovenian                | 10 | 10:131472040 | rs57547298 | 131472040 | G | T | 0.07819 | 17  | 58  | 0.2931 | 22.41   | 2.20E-06 |
| 5 | UK/Slovenian                | 10 | 10:131476611 | rs56880178 | 131476611 | A | G | 0.08111 | 19  | 63  | 0.3016 | 23.61   | 1.18E-06 |
| 5 | UK/Slovenian                | 10 | 10:131476971 | rs56800605 | 131476971 | T | C | 0.08031 | 19  | 61  | 0.3115 | 22.05   | 2.66E-06 |
| 5 | UK/Slovenian                | 10 | 10:131477693 | rs12255679 | 131477693 | A | G | 0.08254 | 20  | 66  | 0.303  | 24.6    | 7.04E-07 |
| 5 | UK/Slovenian                | 10 | 10:131479653 | rs68109323 | 131479653 | G | A | 0.08491 | 23  | 69  | 0.3333 | 23      | 1.62E-06 |
| 5 | UK/Slovenian                | 10 | 10:131479665 | rs67372222 | 131479665 | G | A | 0.08349 | 23  | 69  | 0.3333 | 23      | 1.62E-06 |
| 5 | UK/Slovenian                | 10 | 10:131479680 | rs12245575 | 131479680 | T | C | 0.08427 | 23  | 69  | 0.3333 | 23      | 1.62E-06 |
| 5 | UK/Slovenian                | 10 | 10:131489398 | rs11016878 | 131489398 | A | G | 0.08004 | 16  | 61  | 0.2623 | 26.3    | 2.93E-07 |
|   |                             |    |              |            |           |   |   |         |     |     |        |         |          |
| 5 | Combined Irish/UK/Slovenian | 10 | 10:131471398 | rs11016864 | 131471398 | A | G | 0.1007  | 106 | 151 | 0.702  | 7.879   | 0.005    |
| 5 | Combined Irish/UK/Slovenian | 10 | 10:131471611 | rs11016865 | 131471611 | T | C | 0.1011  | 106 | 152 | 0.6974 | 8.202   | 0.004185 |
| 5 | Combined Irish/UK/Slovenian | 10 | 10:131471968 | rs11016866 | 131471968 | A | G | 0.1013  | 106 | 152 | 0.6974 | 8.202   | 0.004185 |
| 5 | Combined Irish/UK/Slovenian | 10 | 10:131472040 | rs57547298 | 131472040 | G | T | 0.1012  | 107 | 153 | 0.6993 | 8.138   | 0.004334 |
| 5 | Combined Irish/UK/Slovenian | 10 | 10:131476611 | rs56880178 | 131476611 | A | G | 0.1029  | 113 | 159 | 0.7107 | 7.779   | 0.005285 |

|   |                             |    |              |            |           |   |   |         |     |     |        |       |          |
|---|-----------------------------|----|--------------|------------|-----------|---|---|---------|-----|-----|--------|-------|----------|
| 5 | Combined Irish/UK/Slovenian | 10 | 10:131476971 | rs56800605 | 131476971 | T | C | 0.1025  | 113 | 157 | 0.7197 | 7.17  | 0.007412 |
| 5 | Combined Irish/UK/Slovenian | 10 | 10:131477693 | rs12255679 | 131477693 | A | G | 0.1037  | 114 | 162 | 0.7037 | 8.348 | 0.003861 |
| 5 | Combined Irish/UK/Slovenian | 10 | 10:131479653 | rs68109323 | 131479653 | G | A | 0.1055  | 119 | 165 | 0.7212 | 7.451 | 0.006341 |
| 5 | Combined Irish/UK/Slovenian | 10 | 10:131479665 | rs67372222 | 131479665 | G | A | 0.1041  | 117 | 165 | 0.7091 | 8.17  | 0.004258 |
| 5 | Combined Irish/UK/Slovenian | 10 | 10:131479680 | rs12245575 | 131479680 | T | C | 0.1045  | 117 | 165 | 0.7091 | 8.17  | 0.004258 |
| 5 | Combined Irish/UK/Slovenian | 10 | 10:131489398 | rs11016878 | 131489398 | A | G | 0.09711 | 101 | 144 | 0.7014 | 7.547 | 0.006011 |

**Table S3:** TDT results from imputed SNPs in the 10q26 region passing significance threshold  $P < 1E-05$  in individual or combined cohorts. A1 refers to the minor allele, and T and U to the number of times it is transmitted or untransmitted from heterozygous parents to affected offspring.

| Gene   | Exonic variants | N predicted deleterious                                             | N families |
|--------|-----------------|---------------------------------------------------------------------|------------|
| FANK1  | 5               | 2                                                                   | 3          |
| CTBP2  | 6               | 0 (plus an additional 5 discounted as within segmental duplication) | 6          |
| MKI67  | 6               | 2 (plus an additional 1 discounted as within segmental duplication) | 6          |
| TACC2  | 2               | 0                                                                   | 2          |
| DMBT1  | 2               | 2                                                                   | 3          |
| ZRANB1 | 1               | 0                                                                   | 4          |
| CLRN3  | 1               | 0                                                                   | 2          |

**Table S4:** Counts of rare variants (AAF < 0.05 in 1000GP/ESP) found in exome sequence of genes in the 10q26 region. Whole exome sequencing was carried out in 29 individuals from 8 families.

| Position (GRCh37) | Variant (REF/ALT) | rsID        | AAF (CEU)       | Amino Acid change | family   | SIFT score | Prediction        |
|-------------------|-------------------|-------------|-----------------|-------------------|----------|------------|-------------------|
| 127668751         | C/T               | rs17153879  | 0.005           | P>L               | SLOV_028 | 0.03       | Deleterious       |
| 127668863         | GAA/-             | rs146106149 | 0.025           | E deletion        | DUB_15   | -          | In-frame deletion |
| 127693479         | A/G               | rs41302923  | 0.015           | H>R               | SLOV_028 | 0.02       | Deleterious       |
| 127697001         | G/A               | rs139642438 | 0.001 (ESP6500) | G>E               | SLOV_121 | 0.32       | Tolerated         |
| 127697997         | G/T               | rs17153976  | 0.005           | C>F               | SLOV_028 | 0.45       | Tolerated         |

**Table S5:** Exome (coding) variants found in *FANK1* in 3 families from whole exome sequencing. All are consistent with IBD sharing within each family.

| Position (GRCh37) | Variant (REF/ALT) | rsID        | Gene    | N individuals | AAF in VUR cases |
|-------------------|-------------------|-------------|---------|---------------|------------------|
| 124133947         | G/C               | rs72830779  | PLEKHA1 | 2             | 0.03125          |
| 124220567         | G/A               | rs148152439 | HTRA1   | 2             | 0.03125          |
| 126138911         | G/A               | rs140024768 | NKX1-2  | 2             | 0.03125          |
| 129691655         | A/G               | rs182013372 | CLRN3   | 2             | 0.03125          |
| 129924568         | T/A               | rs151328961 | MKI67   | 3             | 0.09375          |
| 131934190         | T/C               | rs11017099  | GLRX3   | 8             | 0.125            |
| 131934191         | A/G               | rs11017100  | GLRX3   | 8             | 0.125            |
| 131934201         | A/G               | rs11017101  | GLRX3   | 8             | 0.125            |
| 131934203         | C/T               | -           | GLRX3   | 8             | 0.125            |
| 131934207         | T/G               | -           | GLRX3   | 8             | 0.125            |
| 131934212         | T/C               | rs11017102  | GLRX3   | 8             | 0.125            |

**Table S6:** Rare variants (AAF<0.01) shared in 2 or more individuals, found in the promoter region of genes other than *FANK1*, from targeted sequencing of 10q26.



| Position (GRCh37) | REF | ALT | VarScan<br>Allele counts | GATK re-call<br>Allele counts |
|-------------------|-----|-----|--------------------------|-------------------------------|
| 127584341         | C   | A   | 29                       | 10                            |
| 127584549         | T   | G   | 27                       | 15                            |
| 127584572         | C   | T   | 29                       | 20                            |
| 127584576         | G   | A   | 29                       | 20                            |
| 127584614         | C   | T   | 30                       | 13                            |
| 127584631         | G   | A   | 29                       | 15                            |
| 127584687         | G   | C   | 31                       | 30                            |
| 127584688         | C   | A   | 31                       | 30                            |
| 127584914         | G   | A   | 31                       | 16                            |
| 127585027         | C   | A   | 29                       | 12                            |
| 127585053         | C   | T   | 24                       | 6                             |

**Table S7:** FANK1 promoter region variants that appeared “real” after visual inspection of .bam files in IGV and re-calling of variants (which were originally called with VarScan) with GATK. All variants are seen as heterozygotes, therefore allele counts equate to the number of individuals carrying the alternative variant.

| Window (bp, GRCh38) | L | M_st | M_p | STB_p                 | Probable variant position | Variant (REF/ALT) | rsID        | VUR AAF (n= 32) | ALSPAC AAF (n=1106)  | Gene                        |
|---------------------|---|------|-----|-----------------------|---------------------------|-------------------|-------------|-----------------|----------------------|-----------------------------|
| 124841200-124841319 | 1 | 1    | 1   | 6.52x10 <sup>-4</sup> | 124841267                 | C/A               | rs533072490 | 0.04            | 0.0                  | 3 kb upstream FAM175B       |
| 125655040-125655159 | 1 | 1    | 1   | 4.43x10 <sup>-4</sup> | 125655088                 | A/T               | rs183471950 | 0.0468          | 0.0016               | TEX36                       |
| 125679640-125679759 | 1 | 1    | 1   | 3.83x10 <sup>-4</sup> | 125679648                 | G/A               | rs541040960 | 0.0313          | 0.0                  | TEX36                       |
| 127059640-127059759 | 1 | 1    | 1   | 1.25x10 <sup>-4</sup> | 127059696                 | A/AT              | rs551248465 | 0.0468          | 5.7x10 <sup>-4</sup> | DOCK1                       |
| 128329480-128329599 | 1 | 1    | 1   | 5.58x10 <sup>-4</sup> | 128329528                 | A/G               | rs146303503 | 0.0468          | 0.0012               | 10 kb downstream LINC01163  |
| 128770720-128770839 | 1 | 1    | 1   | 8.88x10 <sup>-4</sup> | 128770839                 | G/A               | -           | 0.0313          | 0                    | 400 kb downstream LINC01163 |
| 128929840-128929959 | 1 | 1    | 1   | 6.51x10 <sup>-4</sup> | 128929870                 | G/A               | rs182100352 | 0.0313          | 0                    | 500 kb upstream MGMT        |

**Table S8:** The 7 out of the top 10 TASER results that were considered reliable, with MAF threshold 0.05 where L = number of variants “seen” in a particular 120 bp window; M\_st = number of variants passing screening and threshold procedures; M\_p = probable “true” variants; New-STB\_p = Burden statistic p value. VUR and ALSPAC MAFs calculated from read counts at the variant position as determined by inspection of the appropriate “read-count” input file.
